# Supplementary material
Source: PubMed Central journal article supplement (PMC2777710)
Supplement: NIHMS124385-supplement-supplement_1.pdf [file NIHMS124385-supplement-supplement_1.pdf]

## Online only material

Supplemental Table 1. Characteristics of HCV/HIV co-infected mothers according to whether HCV was transmitted to her infant.

| Characteristic                                                           | HCV Transmission <sup>a</sup> |            | P    |
|--------------------------------------------------------------------------|-------------------------------|------------|------|
|                                                                          | Yes (N=16)                    | No (N=47)  |      |
| Age at Delivery                                                          |                               |            |      |
| Mean                                                                     | 31.38                         | 31.29      | 0.96 |
| Time of enrollment                                                       |                               |            |      |
| 1989-2/28/94                                                             | 12 (75.00)                    | 29 (61.70) |      |
| 3/1/94- 7/31/96                                                          | 1 (6.25)                      | 9 (19.14)  |      |
| 8/1/96-1999                                                              | 3 (18.75)                     | 9 (19.14)  | 0.45 |
| CD4 <sup>+</sup> lymphocyte count at enrollment (cells/mm <sup>3</sup> ) |                               |            |      |
| < 200                                                                    | 2 (15.38)                     | 5 (11.36)  |      |
| 200-350                                                                  | 4 (30.76)                     | 11 (25.00) |      |
| 351-500                                                                  | 1 (7.69)                      | 4 (9.09)   |      |
| > 500                                                                    | 6 (46.15)                     | 24 (54.54) | 0.94 |
| Mode of delivery                                                         |                               |            |      |
| Scheduled cesarean section                                               | 2 (15.38)                     | 4 (9.75)   |      |
| Non-scheduled cesarean section                                           | 4 (30.76)                     | 12 (29.26) |      |
| Vaginal birth                                                            | 7 (53.84)                     | 25 (60.97) | 0.83 |
| Duration of membrane rupture                                             |                               |            |      |
| > 4 hours                                                                | 5 (41.66)                     | 21 (51.21) |      |
| ≤ 4 hours                                                                | 7 (58.33)                     | 20 (48.78) | 0.56 |
| Race/ ethnicity                                                          |                               |            |      |
| White                                                                    | 5 (31.25)                     | 13 (27.65) |      |
| Black                                                                    | 4 (25.00)                     | 15 (31.91) |      |
| Other                                                                    | 7 (43.75)                     | 19 (40.42) | 0.87 |
| Study sites                                                              |                               |            |      |
| Boston                                                                   | 4 (25.00)                     | 10 (21.27) |      |
| New York                                                                 | 3 (18.75)                     | 15 (31.91) |      |
| Chicago                                                                  | 5 (31.25)                     | 8 (17.02)  |      |
| Puerto Rico                                                              | 3 (18.75)                     | 10 (21.27) |      |
| Houston                                                                  | 1 (6.25)                      | 4 (8.51)   | 0.79 |
| Antiretroviral regimen                                                   |                               |            |      |
| None                                                                     | 8 (50.00)                     | 25 (53.19) |      |
| Single-drug therapy <sup>b</sup>                                         | 5 (31.25)                     | 14 (29.78) |      |
| Combination therapy <sup>c</sup>                                         | 0 (0.00)                      | 3 (6.38)   |      |
| HAART <sup>d</sup>                                                       | 3 (18.75)                     | 5 (10.63)  | 0.64 |
| STD history                                                              |                               |            |      |
| Yes                                                                      | 7 (43.75)                     | 29 (61.70) |      |
| No                                                                       | 9 (56.25)                     | 18 (38.29) | 0.21 |
| Income                                                                   |                               |            |      |
| < \$10,000/year                                                          | 11 (68.75)                    | 35 (77.77) |      |
| ≥ \$10,000/year                                                          | 5 (31.25)                     | 10 (22.22) | 0.47 |
| Cigarette (tobacco) use                                                  |                               |            |      |
| Yes                                                                      | 11 (68.75)                    | 33 (70.21) |      |
| No                                                                       | 5 (31.25)                     | 14 (29.78) | 0.91 |
| Alcohol use                                                              |                               |            |      |
| Yes                                                                      | 8 (50.00)                     | 28 (59.57) |      |
| No                                                                       | 8 (50.00)                     | 19 (40.42) | 0.50 |
| Hard drug use <sup>e</sup>                                               |                               |            |      |
| Yes                                                                      | 10 (62.50)                    | 32 (68.08) |      |
| No                                                                       | 6 (37.50)                     | 15 (31.91) | 0.68 |
| Gestational age                                                          |                               |            |      |
| ≥ 37 weeks                                                               | 12 (75.00)                    | 29 (61.70) |      |
| < 37 weeks                                                               | 4 (25.00)                     | 18 (38.30) | 0.34 |
| Chorioamnionitis                                                         |                               |            |      |
| Yes                                                                      | 1 (6.66)                      | 1 (2.22)   |      |
| No                                                                       | 14 (93.33)                    | 44 (97.77) | 0.41 |
| Use of fetal electrodes                                                  |                               |            |      |
| Yes                                                                      | 1 (6.66)                      | 1 (2.22)   |      |
| No                                                                       | 14 (93.33)                    | 44 (97.77) | 0.41 |
| Infant HIV status                                                        |                               |            |      |
| Infected                                                                 | 5 (31.25)                     | 8 (17.02)  |      |
| Uninfected                                                               | 10 (62.50)                    | 39 (82.97) |      |
| Indeterminate                                                            | 1 (6.25)                      | 0 (0.00)   | 0.09 |

NOTE. Maternal factors were ascertained at final antenatal visit and refer to characteristics or behaviors during course of pregnancy. When information was missing for certain women, sum of measurements does not equal the total for all factors. P was calculated from Chi-square or F-test statistic comparing distributions among the two groups. HCV= hepatitis C virus, HIV= human immunodeficiency virus, HAART= highly active antiretroviral therapy, STD= sexually transmitted disease.

<sup>a</sup> Data are no. (%) of subjects, unless otherwise indicated.

<sup>b</sup> Single-drug therapy was defined as treatment with a single drug.

<sup>c</sup> Combination therapy was defined as either two drugs, one of which could be a protease inhibitor or a nonnucleoside reverse-transcriptase inhibitor (NNRTI), or as  $\geq$  two drugs that did not include a protease inhibitor or NNRTI, or as the combination of zidovudine, lamivudine, and abacavir.

<sup>d</sup> HAART was defined as a treatment regimen including  $\geq$  three drugs, one of which was a protease inhibitor or NNRTI.

<sup>e</sup> Cocaine, heroin or other opiates, methadone, other injecting drug use.
